# Supplementary figures and images for: A new role for circulating T follicular helper cells in humoral response to anti-PD-1 therapy
Source: PubMed Central journal article supplement — J Immunother Cancer. 2020 Sep 7;8(2):e001187. doi: 10.1136/jitc-2020-001187 (PMC7478024; doi:10.1136/jitc-2020-001187), 2020-09-07

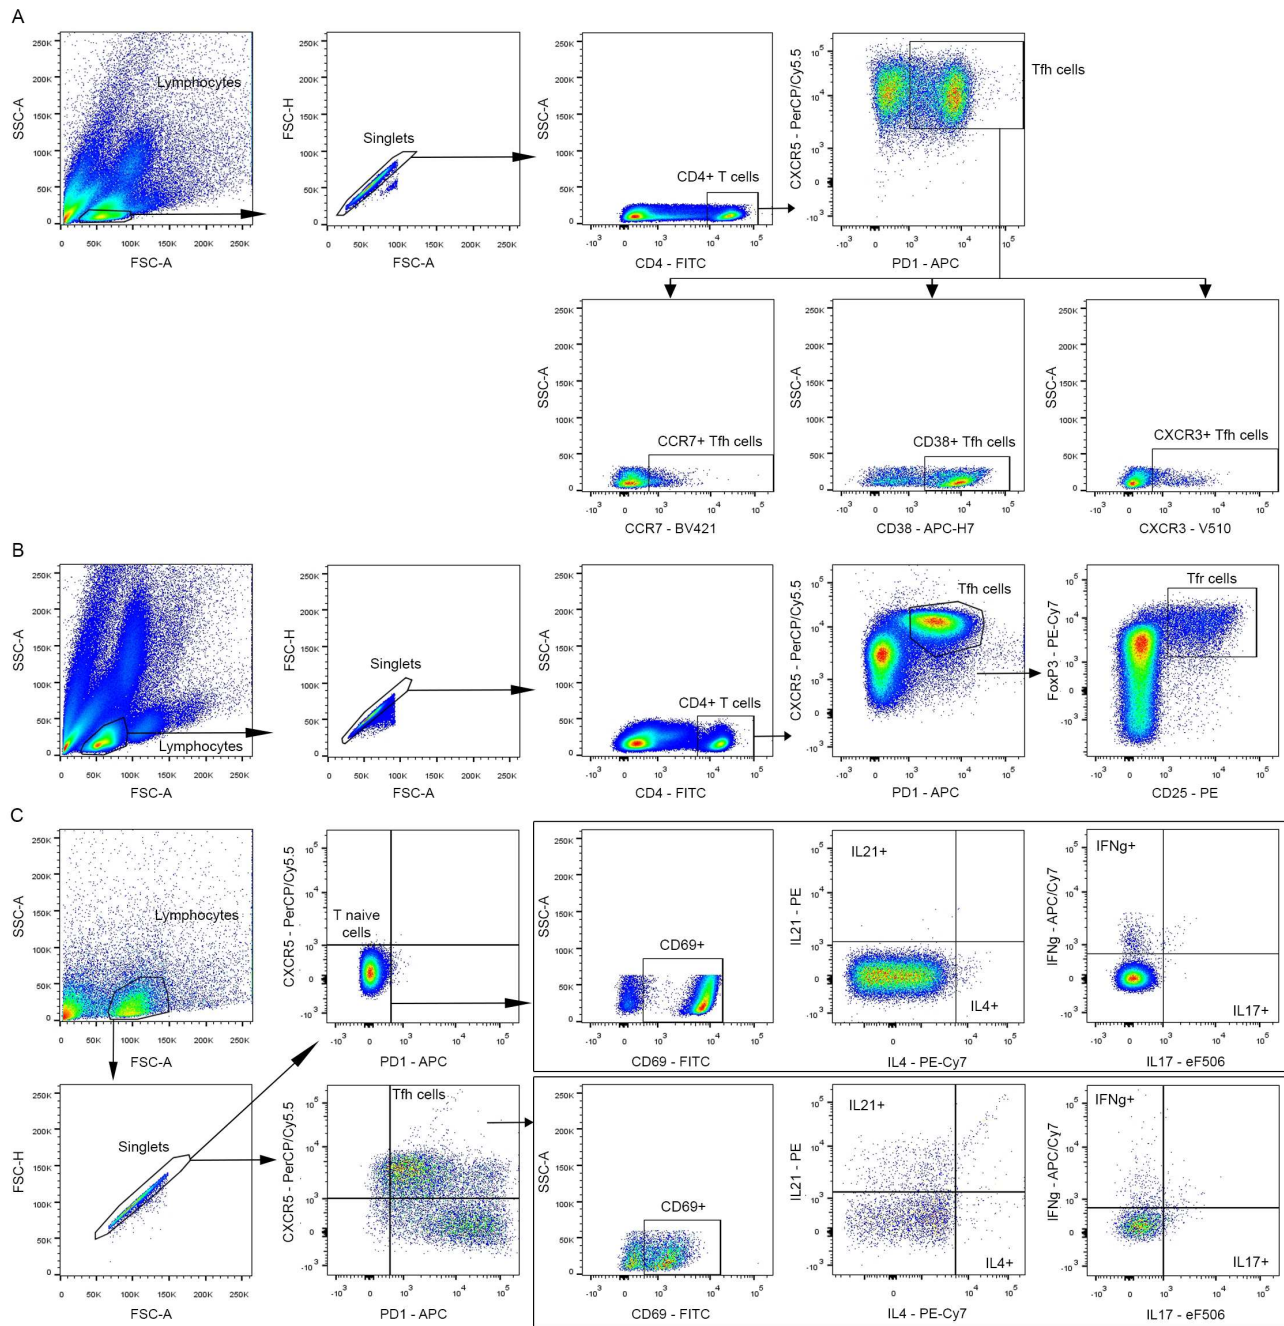

Supplement: jitc-2020-001187supp006.pdf [file jitc-2020-001187supp006.pdf]
